# Supplementary material
Source: Springer Nature journal article supplement (https://www.springermedizin.de/resource/supplementary/12885_2010_2579_MOESM6_ESM.pdf/9462612)

N1 N2 N3 C1 C2 C3 C1+tgf C2+tgf C3+tgf

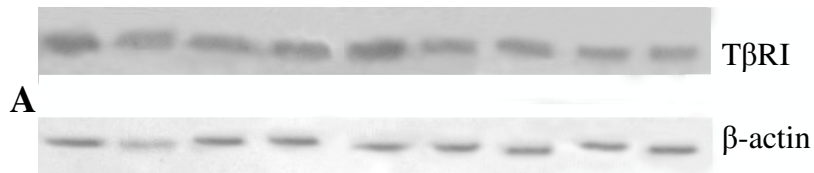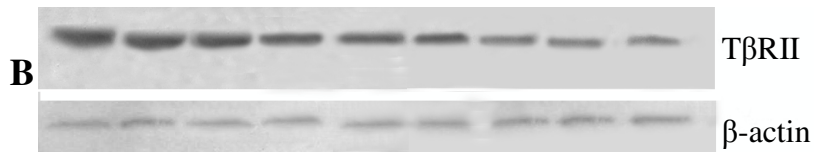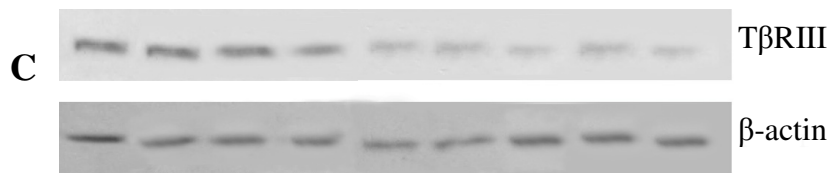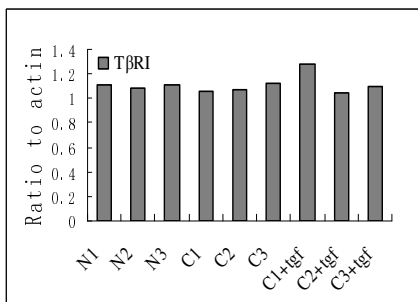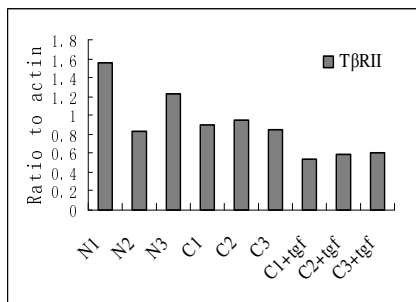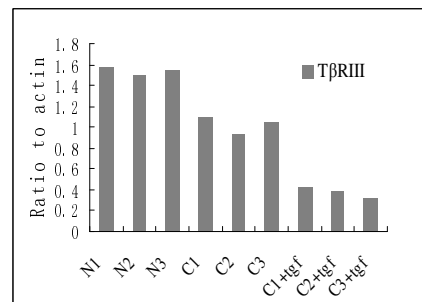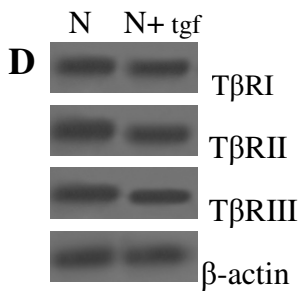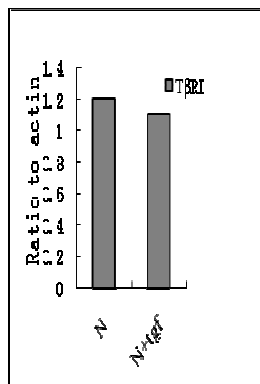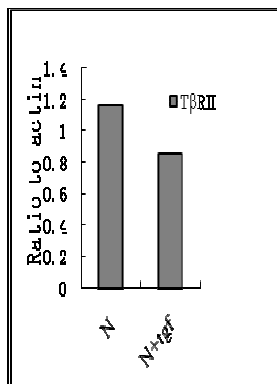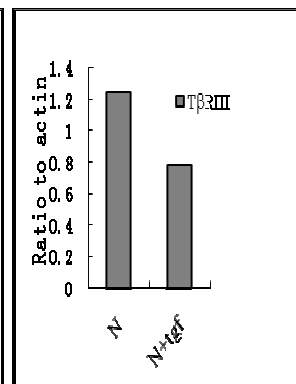

Supplement: MOESM6 [file 9462612]
